# Supplementary material for: Transcriptome Analysis Reveals Differences in Key Genes and Pathways Regulating Carbon and Nitrogen Metabolism in Cotton Genotypes under N Starvation and Resupply
Source: MDPI journal article supplement (doi:10.3390/ijms21041500), 2020-02-22
Supplement: s1 [file s1]

**Supplementary Table S1.** Number of up- and down-regulated DEGs responsible for amino acid, carbon and nitrogen metabolism in the roots of contrasting nitrogen efficient cotton genotypes in response to N starvation and resupply.

| <b>Amino acid metabolism</b>                | <b>XLZ-30</b> |             | <b>CCRI-69</b> |             |
|---------------------------------------------|---------------|-------------|----------------|-------------|
|                                             | <b>Up</b>     | <b>Down</b> | <b>Up</b>      | <b>Down</b> |
| Alanine, aspartate and glutamate metabolism | 2             | 4           | 3              | 5           |
| Arginine biosynthesis                       | 2             | 10          | 2              | 10          |
| Cysteine and methionine metabolism          | 1             | 6           | 2              | 6           |
| Glutathione metabolism                      | 0             | 1           | 0              | 1           |
| Glycine, serine and threonine metabolism    | 0             | 5           | 2              | 5           |
| Histidine metabolism                        | 0             | 2           | 0              | 2           |
| Lysine degradation                          | 2             | 0           | 2              | 0           |
| Monobactam biosynthesis                     | 0             | 1           | 0              | 1           |
| Pyrimidine metabolism                       | 0             | 1           | 0              | 1           |
| Valine, leucine and isoleucine biosynthesis | 0             | 3           | 0              | 3           |
| <b>Carbon metabolism</b>                    |               |             |                |             |
| Amino sugar and nucleotide sugar metabolism | 1             | 1           | 1              | 0           |
| Carbon fixation                             | 0             | 1           | 2              | 0           |
| Glyoxylate and dicarboxylate metabolism     | 0             | 2           | 6              | 0           |
| Starch and sucrose metabolism               | 0             | 5           | 0              | 4           |
| Glycolysis / Gluconeogenesis                | 1             | 15          | 4              | 12          |
| Pentose phosphate pathway                   | 0             | 12          | 0              | 11          |
| Fructose and mannose metabolism             | 2             | 1           | 2              | 1           |
| Galactose metabolism                        | 2             | 1           | 2              | 1           |
| Fatty acid elongation                       | 1             | 0           | 1              | 0           |
| Pentose and glucuronate interconversions    | 1             | 4           | 2              | 4           |
| Phenylpropanoid biosynthesis                | 1             | 0           | 1              | 1           |
| <b>Nitrogen metabolism</b>                  |               |             |                |             |
| Nitrate reductase                           | 0             | 4           | 0              | 4           |
| Glutamine synthetase                        | 2             | 6           | 2              | 4           |
| Nitrite reductase                           | 0             | 2           | 0              | 2           |
| Glutamate synthase                          | 0             | 1           | 0              | 1           |
| Glutamate dehydrogenase                     | 0             | 1           | 0              | 1           |
| Asparagine synthetase                       | 0             | 3           | 0              | 4           |
| cytochrome b5                               | 1             | 2           | 1              | 1           |

**Supplementary Table S2.** Number of up- and down-regulated DEGs responsible for amino acid, carbon and nitrogen metabolism in the shoots of contrasting nitrogen efficient cotton genotypes in response to N starvation and resupply.

| Amino acid metabolism                               | XLZ-30 |      | CCRI-69 |      |
|-----------------------------------------------------|--------|------|---------|------|
|                                                     | Up     | Down | Up      | Down |
| Alanine, aspartate and glutamate metabolism         | 4      | 6    | 8       | 3    |
| Arginine and proline metabolism                     | 4      | 1    | 2       | 2    |
| Arginine biosynthesis                               | 5      | 2    | 6       | 2    |
| Cysteine and methionine metabolism                  | 2      | 7    | 8       | 1    |
| Glycine, serine and threonine metabolism            | 1      | 3    | 7       | 0    |
| Histidine metabolism                                | 0      | 0    | 1       | 0    |
| Lysine biosynthesis                                 | 0      | 1    | 2       | 0    |
| Lysine degradation                                  | 2      | 0    | 1       | 0    |
| Monobactam biosynthesis                             | 0      | 0    | 2       | 0    |
| Phenylalanine metabolism                            | 0      | 0    | 2       | 0    |
| Phenylalanine, tyrosine and tryptophan biosynthesis | 0      | 1    | 8       | 0    |
| Pyrimidine metabolism                               | 0      | 0    | 1       | 0    |
| Purine metabolism                                   | 1      | 0    | 0       | 1    |
| Synthesis and degradation of ketone bodies          | 0      | 0    | 2       | 0    |
| Taurine and hypotaurine metabolism                  | 0      | 1    | 1       | 0    |
| Valine, leucine and isoleucine biosynthesis         | 2      | 1    | 5       | 0    |
| Amino sugar and nucleotide sugar metabolism         | 0      | 0    | 0       | 1    |
| Carbon metabolism                                   |        |      |         |      |
| Carbon fixation                                     | 1      | 2    | 2       | 1    |
| Cutin, suberine and wax biosynthesis                | 0      | 2    | 1       | 0    |
| Cyanoamino acid metabolism                          | 0      | 1    | 1       | 2    |
| Fructose and mannose metabolism                     | 0      | 2    | 2       | 1    |
| Galactose metabolism                                | 3      | 2    | 5       | 2    |
| Glycolysis / Gluconeogenesis                        | 5      | 5    | 12      | 5    |
| N-Glycan biosynthesis                               | 0      | 0    | 1       | 0    |
| Oxidative phosphorylation                           | 0      | 0    | 0       | 1    |
| Pentose and glucuronate interconversions            | 1      | 5    | 4       | 12   |
| Pentose phosphate pathway                           | 0      | 2    | 4       | 0    |
| Phenylpropanoid biosynthesis                        | 1      | 2    | 3       | 1    |
| Starch and sucrose metabolism                       | 8      | 11   | 19      | 9    |
| Nitrogen metabolism                                 |        |      |         |      |
| Nitrate reductase                                   | 0      | 4    | 2       | 1    |
| Glutamine synthetase                                | 2      | 1    | 2       | 1    |
| Nitrite reductase                                   | 0      | 2    | 0       | 0    |
| Glutamate synthase                                  | 0      | 2    | 0       | 0    |
| Glutamate dehydrogenase                             | 0      | 0    | 1       | 0    |
| Asparagine synthetase                               | 2      | 2    | 3       | 0    |
| cytochrome b5                                       | 0      | 0    | 2       | 1    |

**Supplementary Table S3.** Hub genes up and down-regulated in the root of contrasting N-efficient cotton genotypes in response to N starvation and resupply.

| Category   | Gene ID         | CCRI-69       | XLZ-30        |
|------------|-----------------|---------------|---------------|
| Amino acid | Ghir_D13G024390 | Downregulated | Downregulated |
| Amino acid | Ghir_A13G023660 | Downregulated | Downregulated |
| Amino acid | Ghir_A09G009700 | Downregulated | Downregulated |
| Amino acid | Ghir_A13G023660 | Downregulated | Downregulated |
| Amino acid | Ghir_D02G003120 | Downregulated | Downregulated |
| Amino acid | Ghir_A06G006700 | Downregulated | Downregulated |
| Amino acid | Ghir_A13G005930 | Upregulated   | Upregulated   |
| Amino acid | Ghir_D09G020360 | Downregulated | Downregulated |
| Amino acid | Ghir_A04G016360 | Downregulated | Downregulated |
| Amino acid | Ghir_D05G014390 | Downregulated | Downregulated |
| Amino acid | Ghir_A02G002720 | Downregulated | Downregulated |
| Amino acid | Ghir_A13G005930 | Upregulated   | Upregulated   |
| Amino acid | Ghir_D09G020360 | Downregulated | Downregulated |
| Amino acid | Ghir_A05G038060 | Downregulated | Downregulated |
| Amino acid | Ghir_D04G004990 | Downregulated | Downregulated |
| Amino acid | Ghir_D09G021650 | Downregulated | Downregulated |
| Amino acid | Ghir_A07G022270 | Downregulated | Downregulated |
| Amino acid | Ghir_D07G022350 | Upregulated   | Upregulated   |
| Amino acid | Ghir_D08G025080 | Downregulated | Downregulated |
| Amino acid | Ghir_A08G024180 | Downregulated | Downregulated |
| Amino acid | Ghir_D06G014880 | Downregulated | Downregulated |
| Amino acid | Ghir_A10G012370 | Downregulated | Downregulated |
| Amino acid | Ghir_A06G008720 | Upregulated   | Upregulated   |
| Amino acid | Ghir_D02G003060 | Downregulated | Downregulated |
| Amino acid | Ghir_D06G008920 | Upregulated   | Upregulated   |
| Nitrogen   | Ghir_D12G026390 | Downregulated | Downregulated |
| Nitrogen   | Ghir_D02G003120 | Downregulated | Downregulated |
| Nitrogen   | Ghir_A02G002720 | Downregulated | Downregulated |
| Nitrogen   | Ghir_A13G005930 | Upregulated   | Upregulated   |
| Nitrogen   | Ghir_D09G020360 | Downregulated | Downregulated |
| Nitrogen   | Ghir_A13G023660 | Downregulated | Downregulated |
| Nitrogen   | Ghir_A09G009700 | Downregulated | Downregulated |
| Nitrogen   | Ghir_D13G024390 | Downregulated | Downregulated |
| Carbon     | Ghir_D11G017390 | Upregulated   | Upregulated   |
| Carbon     | Ghir_A11G017320 | Upregulated   | Upregulated   |
| Carbon     | Ghir_D04G005980 | Upregulated   | Upregulated   |
| Carbon     | Ghir_D06G004020 | Downregulated | Downregulated |
| Carbon     | Ghir_A06G003910 | Downregulated | Downregulated |
| Carbon     | Ghir_A02G009250 | Downregulated | Downregulated |
| Carbon     | Ghir_D02G015800 | Downregulated | Downregulated |

|        |                 |               |               |
|--------|-----------------|---------------|---------------|
| Carbon | Ghir_A12G024710 | Downregulated | Downregulated |
|--------|-----------------|---------------|---------------|

**Supplementary Table S4.** Hub genes up and down-regulated in the shoot of contrasting N-efficient cotton genotypes in response to N starvation and resupply.

| Category   | Gene ID         | CCRI-69       | XLZ-30        |
|------------|-----------------|---------------|---------------|
| Amino acid | Ghir_A09G021540 | Upregulated   | Downregulated |
| Amino acid | Ghir_A13G017290 | Upregulated   | Downregulated |
| Amino acid | Ghir_D13G017980 | Upregulated   | Downregulated |
| Amino acid | Ghir_D12G002180 | Upregulated   | Downregulated |
| Amino acid | Ghir_A13G023000 | Downregulated | Upregulated   |
| Amino acid | Ghir_A06G009280 | Upregulated   | Downregulated |
| Amino acid | Ghir_D06G009760 | Upregulated   | Downregulated |
| Amino acid | Ghir_A06G006700 | Upregulated   | Downregulated |
| Amino acid | Ghir_A12G011030 | Upregulated   | Downregulated |
| Amino acid | Ghir_D05G003480 | Upregulated   | Downregulated |
| Amino acid | Ghir_A12G028500 | Upregulated   | Downregulated |
| Amino acid | Ghir_A13G014560 | Upregulated   | Downregulated |
| Amino acid | Ghir_A09G009680 | Upregulated   | No change     |
| Amino acid | Ghir_D09G020360 | Downregulated | Upregulated   |
| Amino acid | Ghir_A07G018740 | Upregulated   | Downregulated |
| Amino acid | Ghir_D12G028670 | Upregulated   | Downregulated |
| Amino acid | Ghir_A07G018790 | Upregulated   | Downregulated |
| Amino acid | Ghir_A07G012910 | Upregulated   | Downregulated |
| Amino acid | Ghir_A06G014110 | Upregulated   | Downregulated |
| Amino acid | Ghir_A01G011530 | Upregulated   | Downregulated |
| Amino acid | Ghir_D07G017980 | Upregulated   | Upregulated   |
| Amino acid | Ghir_A09G020960 | Downregulated | Upregulated   |
| Amino acid | Ghir_A12G016440 | Downregulated | No change     |
| Amino acid | Ghir_D13G023640 | Downregulated | Upregulated   |
| Amino acid | Ghir_D06G007420 | Upregulated   | Downregulated |
| Amino acid | Ghir_D10G022890 | Upregulated   | Downregulated |
| Amino acid | Ghir_D01G022210 | Upregulated   | Upregulated   |
| Amino acid | Ghir_D04G012180 | Upregulated   | No change     |
| Amino acid | Ghir_A05G022930 | Upregulated   | Downregulated |
| Amino acid | Ghir_A07G002780 | Upregulated   | No change     |
| Amino acid | Ghir_D07G005800 | Upregulated   | Downregulated |
| Amino acid | Ghir_D12G011120 | Upregulated   | Downregulated |
| Amino acid | Ghir_A07G017570 | Upregulated   | Downregulated |
| Amino acid | Ghir_A04G014400 | Upregulated   | Downregulated |
| Amino acid | Ghir_D05G006020 | Upregulated   | No change     |
| Amino acid | Ghir_D13G024390 | Upregulated   | Downregulated |
| Amino acid | Ghir_A03G010810 | Upregulated   | Downregulated |
| Amino acid | Ghir_A09G022390 | Upregulated   | Downregulated |

|            |                 |               |               |
|------------|-----------------|---------------|---------------|
| Amino acid | Ghir_D09G021650 | Upregulated   | Downregulated |
| carbon     | Ghir_D10G008680 | Downregulated | Upregulated   |
| carbon     | Ghir_A01G011760 | Upregulated   | Downregulated |
| carbon     | Ghir_A08G009680 | Upregulated   | Downregulated |
| carbon     | Ghir_D04G005320 | Downregulated | No change     |
| carbon     | Ghir_A03G008550 | Downregulated | Downregulated |
| carbon     | Ghir_D13G008490 | Downregulated | No change     |
| carbon     | Ghir_D01G013270 | Upregulated   | Downregulated |
| carbon     | Ghir_D03G011050 | Upregulated   | Downregulated |
| carbon     | Ghir_A01G020200 | Upregulated   | Downregulated |
| carbon     | Ghir_D09G014570 | Upregulated   | Downregulated |
| carbon     | Ghir_A02G011710 | Downregulated | Upregulated   |
| carbon     | Ghir_A12G023160 | Downregulated | Upregulated   |
| carbon     | Ghir_D11G006370 | Upregulated   | Downregulated |
| carbon     | Ghir_D11G017960 | Upregulated   | Downregulated |
| carbon     | Ghir_A13G023760 | Downregulated | Upregulated   |
| carbon     | Ghir_A05G013940 | No change     | No change     |
| carbon     | Ghir_A13G020910 | Upregulated   | Downregulated |
| carbon     | Ghir_D13G001770 | Upregulated   | Downregulated |
| carbon     | Ghir_A11G017920 | Upregulated   | Downregulated |
| carbon     | Ghir_D03G006990 | Downregulated | Upregulated   |
| carbon     | Ghir_A03G013490 | Downregulated | No change     |
| carbon     | Ghir_D12G020110 | Downregulated | Upregulated   |
| carbon     | Ghir_A12G019870 | Downregulated | No change     |
| carbon     | Ghir_A07G019010 | Upregulated   | No change     |
| carbon     | Ghir_D13G021730 | Upregulated   | Downregulated |
| carbon     | Ghir_D07G019350 | Upregulated   | Downregulated |
| carbon     | Ghir_A07G001840 | Downregulated | No change     |
| carbon     | Ghir_A11G022120 | Upregulated   | No change     |
| carbon     | Ghir_A11G015470 | Downregulated | Upregulated   |
| carbon     | Ghir_D09G001040 | Upregulated   | Downregulated |
| Nitrogen   | Ghir_D09G020360 | Downregulated | Upregulated   |
| Nitrogen   | Ghir_A09G009680 | Upregulated   | No change     |
| Nitrogen   | Ghir_A13G023660 | Upregulated   | Downregulated |
| Nitrogen   | Ghir_A07G018790 | Upregulated   | Downregulated |
| Nitrogen   | Ghir_A09G020960 | Downregulated | Upregulated   |
| Nitrogen   | Ghir_D13G024390 | Upregulated   | Downregulated |

**Supplementary Table S5.** Gene specific primers used for RT-qPCR.

| Gene ID         | Gene name | Specific primer        |
|-----------------|-----------|------------------------|
| Ghir_A01G018110 | NR-1F     | TGGTATGGTATTCGAGCACCCA |
| Ghir_A01G018110 | NR-1R     | GTCGTAGATATGACCATGGAC  |
| Ghir_A02G007870 | NR-2F     | TCGAAGGAGCTGAGCATTTC   |

|                 |            |                           |
|-----------------|------------|---------------------------|
| Ghir_A02G007870 | NR-2R      | TTCGTTGTAACAATGATTCGT     |
| Ghir_D02G003120 | GS-1F      | GTGGAGTTCTCTGGTACTGA      |
| Ghir_D02G003120 | GS-1R      | AACGTATTCAGCGATGATCT      |
| Ghir_A04G011580 | GS-2F      | ATCGATGAGAAATGATGGTGG     |
| Ghir_A04G011580 | GS-2R      | GGCAGTCTCGTGAAGACCT       |
| Ghir_A13G003840 | NiR-1F     | GGATTGAAGTGTTTCAGATCAGAG  |
| Ghir_A13G003840 | NiR-1R     | GTTTCGTCCATGTCGTCAGCTTGG  |
| Ghir_D13G004040 | NiR-2F     | GTATTGAAGTGTTTCAGATCAGAAG |
| Ghir_D13G004040 | NiR-2R     | GTTTCGTCCATGTCGTCGGCTTG   |
| Ghir_A12G026360 | GOGAT-1F   | ATGAGCGTTATGGGTTGTAA      |
| Ghir_A12G026360 | GOGAT-1R   | ACATCACCAACGAGATGCAA      |
| Ghir_D06G018750 | GOGAT-2F   | GTGAAGCCCAGTAACACGGA      |
| Ghir_D06G018750 | GOGAT-2R   | CTGAGCCATTTGATAGCTGATG    |
| Ghir_A03G007160 | GDH-1F     | TCAAGGTTTCATGTGGGATGAAG   |
| Ghir_A03G007160 | GDH-1R     | GTTACCCCAAGTGTAATGCGC     |
| Ghir_D10G006710 | GDH-2F     | TCTTGCAGAGTTGAATAAAGA     |
| Ghir_D10G006710 | GDH-2R     | CCATCCTCGTCAACCAAATACC    |
| Ghir_D09G009410 | ASN-1F     | GACCGAAAGACTGATGACTGA     |
| Ghir_D09G009410 | ASN-1R     | TAGTCTGCAACCTCCCTTGC      |
| Ghir_D13G024390 | ASN-2F     | TTGTTATTTGGCTCATCAACGC    |
| Ghir_D13G024390 | ASN-2R     | GTA CTCCTCATACAAATGTGC    |
| Ghir_A02G008900 | Cytb5-1F   | GTGACAAAGTTCATGGAAGA      |
| Ghir_A02G008900 | Cytb5-1R   | GGAGCAAATTCTGAGCTGAC      |
| Ghir_D02G009090 | Cytb5-2F   | GAACGTAACAAAGTTCCTGGAA    |
| Ghir_D02G009090 | Cytb5-2R   | GAGCAAATTCTGAGCCGACTT     |
| AT5G09810       | Gh H 3.3-F | CCTTGTGGGTCTTTTTGAA       |
| AT5G09810       | Gh H 3.3-R | AACTGGATGTCCTTGGGC        |

---
